# Supplementary material
Source: Springer Nature journal article supplement (https://www.springermedizin.de/resource/supplementary/13256_2009_1057_MOESM3_ESM.pdf/9647722)

No cut

P R

P L

No VOI

0.6mm 1.375:1/0.6sp

W = 753 L = 212

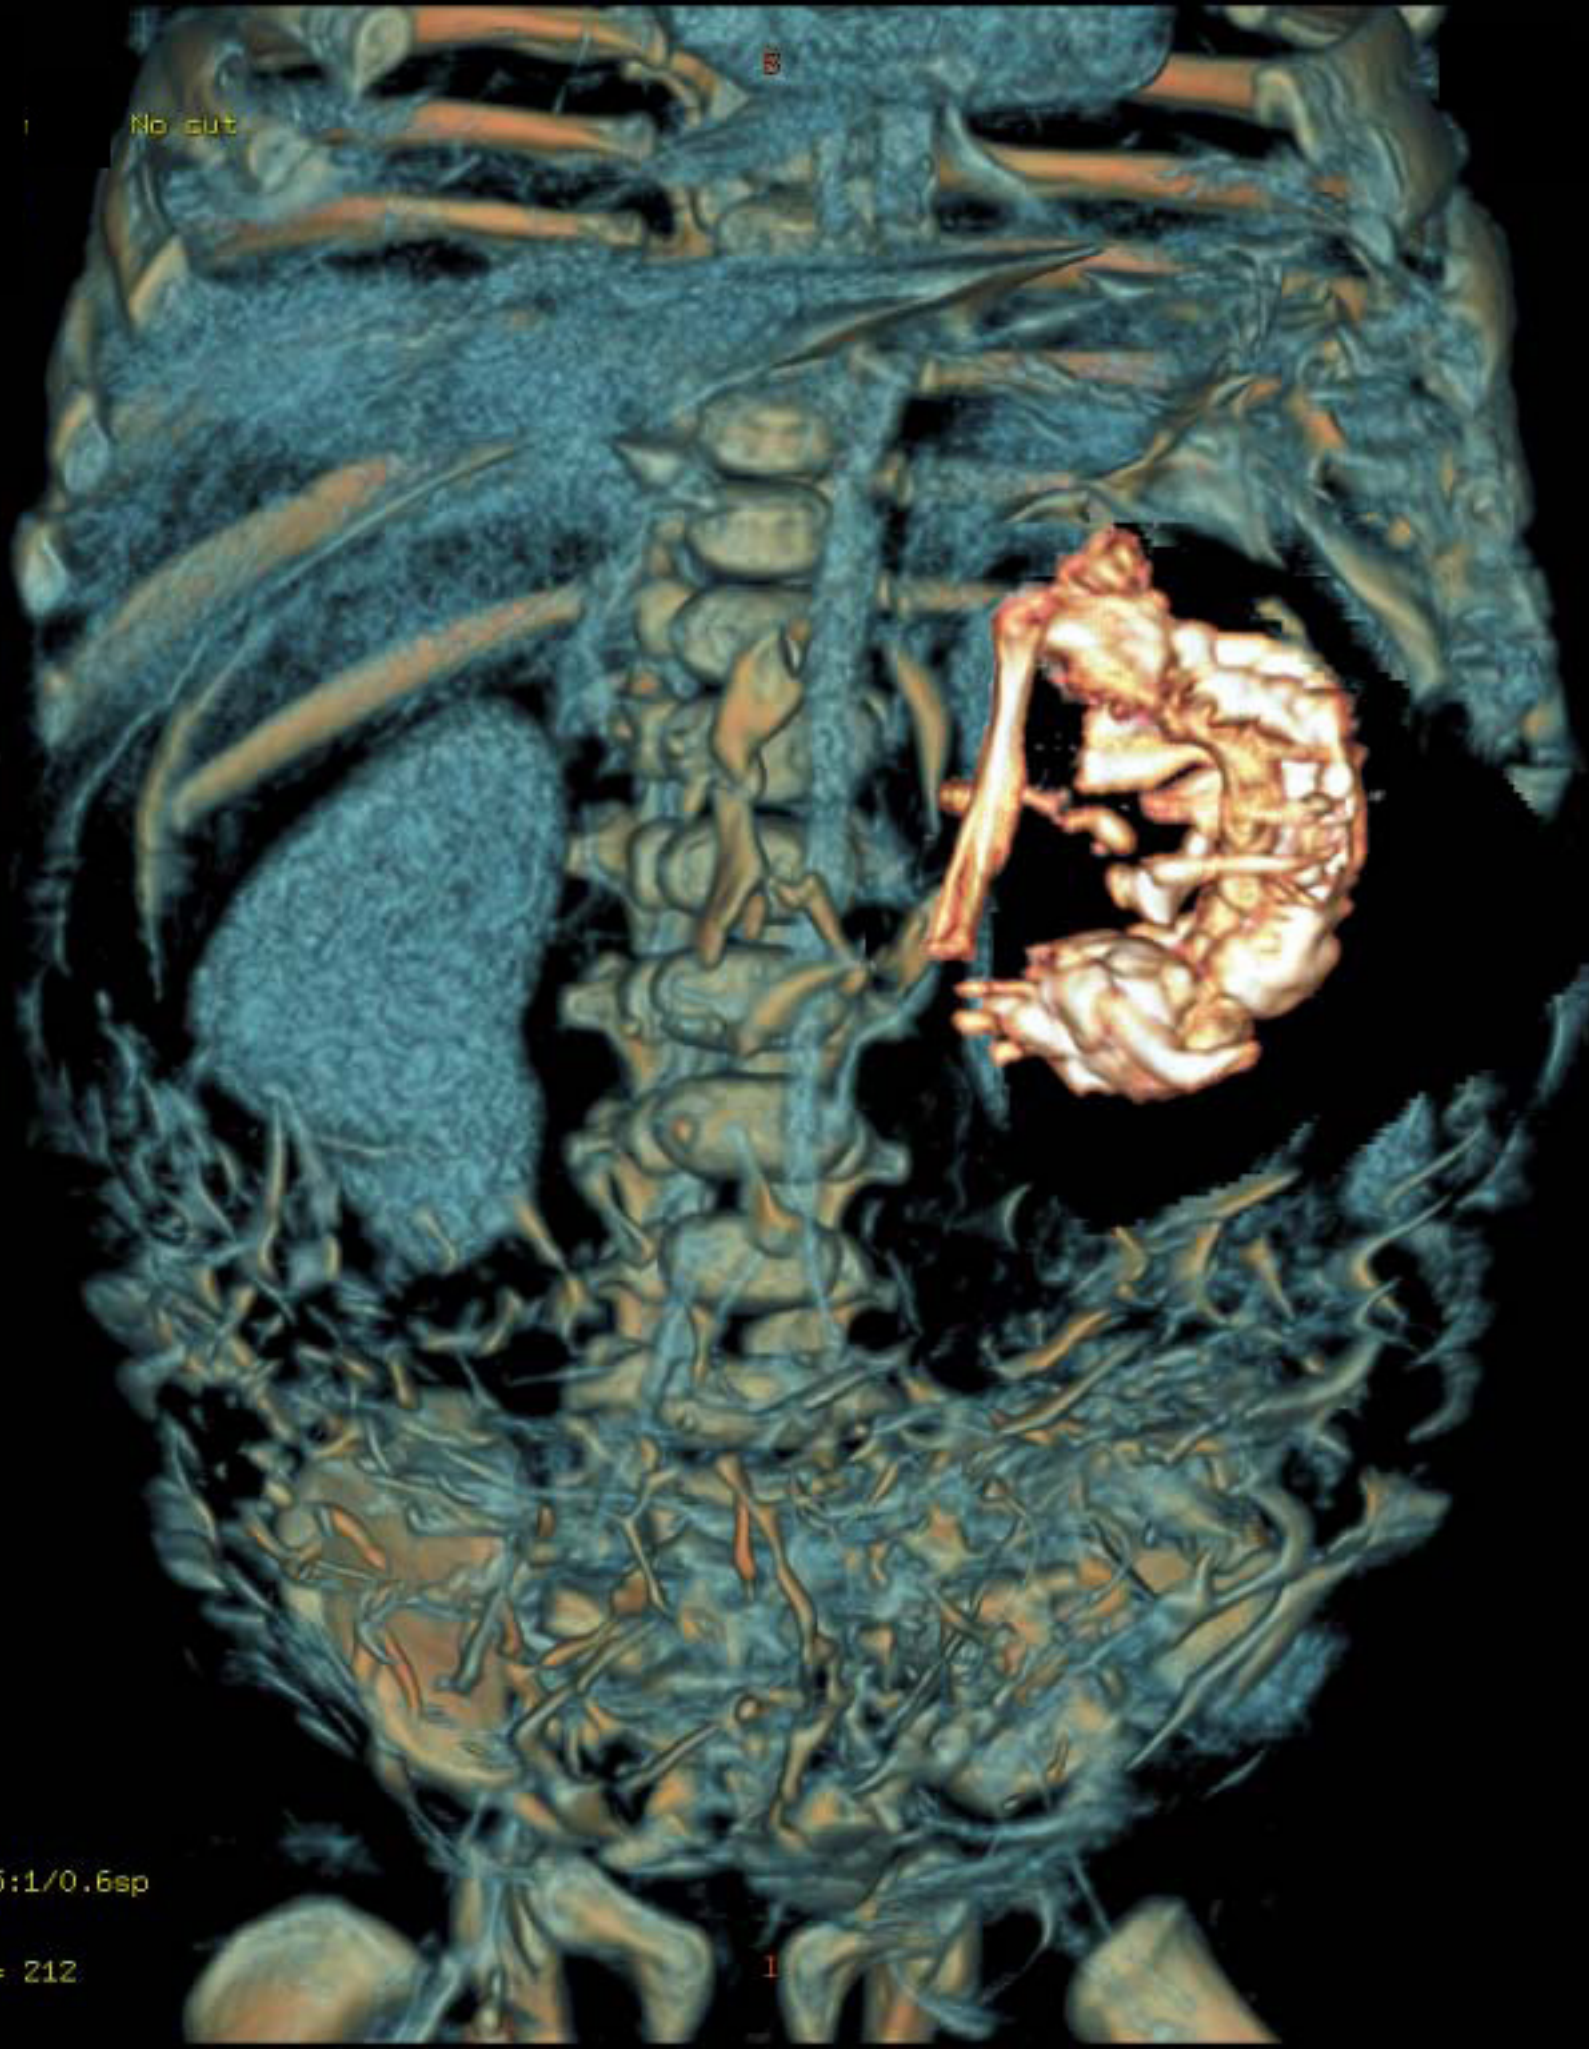

Supplement: MOESM3 [file 9647722]
